# Supplementary material for: Synthesis and characterisation of group nine transition metal complexes containing new mesityl and naphthyl based azaindole scorpionate ligands
Source: Royal Society of Chemistry journal article supplement (doi:10.1039/c0dt01576h), 2011-01-01
Supplement: c0dt01576h.pdf [file c0dt01576h.pdf]

# Electronic Supporting Information for ‘*Synthesis and characterisation of group nine transition metal complexes containing new mesityl and naphthyl based azaindole scorpionate ligands*’

Gareth R. Owen, Nikolaos Tsoureas, Rebecca F. Hope, Yu-Ying Kuo and Mairi F. Haddow

The School of Chemistry, University of Bristol, Cantock’s Close, Bristol, UK, BS8 1TS

## Additional experimental details

### General considerations

The solvents toluene, THF, DCM and acetonitrile were dried using a Grubbs’ alumina system, and were kept in flame-dried Young’s ampoules under N<sub>2</sub> over molecular sieves (4 Å). Dry n-pentane (<0.05 ppm H<sub>2</sub>O) was purchased from Fluka and was kept in a flame-dried Young’s ampoule under N<sub>2</sub> over molecular sieves (4 Å). Deuterated toluene and C<sub>6</sub>D<sub>6</sub> were degassed by three freeze-thaw cycles, dried by refluxing over Na or Na/benzophenone respectively for 12 hours, vacuum distilled and kept in a flame-dried Young’s ampoule over 4 Å molecular sieves under N<sub>2</sub>. Deuterated DCM was degassed by three freeze-thaw cycles, dried by refluxing over CaH<sub>2</sub> for 12 hours, vacuum distilled and kept in a Young’s ampoule over 4 Å molecular sieves under N<sub>2</sub>. <sup>1</sup>H-NMR, <sup>11</sup>B{<sup>1</sup>H}-NMR, <sup>11</sup>B-NMR and <sup>7</sup>Li{<sup>1</sup>H}-NMR spectra were recorded on a JEOL ECP300 spectrometer operating at 300 MHz (<sup>1</sup>H). <sup>1</sup>H{<sup>11</sup>B}-NMR spectra were recorded on a JEOL Lamda300 spectrometer operating at 300 MHz (<sup>1</sup>H). <sup>13</sup>C{<sup>1</sup>H}-NMR spectra and correlation experiments were recorded on a Varian VNMR S500 or JEOL ECP400 spectrometers. The spectra were referenced to an internal standard, to the residual protic solvent (<sup>1</sup>H) or the signals of the solvent (<sup>13</sup>C). <sup>11</sup>B{<sup>1</sup>H}-NMR and <sup>11</sup>B-NMR spectra were referenced externally relative to BF<sub>3</sub>·OEt<sub>2</sub>. <sup>7</sup>Li{<sup>1</sup>H}-NMR spectra were referenced externally to LiCl in D<sub>2</sub>O.

### Further characterisation of Li(MeCN)<sub>2</sub>[<sup>Naphth</sup>Bai]

Small quantities of the coordinated acetonitrile were found to dissociate in solution leading to two observable species in solution (in a ratio of *ca.* 85:15). See manuscript for further details. NMR δ ppm: <sup>1</sup>H (CDCl<sub>3</sub>), 1.92 (s, 6 H, coordinated CH<sub>3</sub>CN), 5.30–5.80 (v. br., 1H, BH), 6.38 (d, <sup>3</sup>J<sub>HH</sub> = 3.4 Hz, 2H, aza-CH(3)), 6.84 [dd, <sup>3</sup>J<sub>HH</sub> = 7.3 Hz, <sup>3</sup>J<sub>HH</sub> = 4.9 Hz, 2H, aza-CH(5)], 7.11 [τ, J<sub>HH</sub> = 7.9 Hz, 1H, nap-CH(6)], 7.23 [br., 2H, aza-CH(2)], 7.28 [br, 1H, nap-CH(2)], 7.32 [τd, J<sub>HH</sub> = 7.9 Hz, <sup>4</sup>J<sub>HH</sub> = 1.2 Hz, 1H, nap-CH(7)], 7.39 [τ, J<sub>HH</sub> = 7.3 Hz, 1H, nap-CH(3)], 7.73 [br., 2H, aza-CH(4)], 7.77 [two overlapping doublets, J<sub>HH</sub> = 8.1 Hz, 2H, nap-CH(5) and -CH(4)], 7.82 [d, <sup>3</sup>J<sub>HH</sub> = 7.9 Hz, 1H, nap-CH(8)], 7.88 [dd, <sup>3</sup>J<sub>HH</sub> = 8.2 Hz, <sup>4</sup>J<sub>HH</sub> = 1.2 Hz, 2H, aza-CH(6)]; <sup>11</sup>B{<sup>1</sup>H}, (CD<sub>2</sub>Cl<sub>2</sub>), –8.9 (85%, Δν<sub>1/2</sub> = 97 Hz) and –4.0 (15%, Δν<sub>1/2</sub> = 94 Hz); <sup>11</sup>B, –8.9 (d, <sup>1</sup>J<sub>BH</sub> = 74 Hz, Δν<sub>1/2</sub> = 194 Hz) and –4.0 (d, <sup>1</sup>J<sub>BH</sub> = 92 Hz, Δν<sub>1/2</sub> = 194 Hz); <sup>7</sup>Li{<sup>1</sup>H} (CD<sub>2</sub>Cl<sub>2</sub>), 5.3 (s, 85%) and 3.8 (s, 15%).

### Selected data for Li[BH<sub>3</sub>(mesityl)]•(THF)<sub>x</sub>(Et<sub>2</sub>O)<sub>y</sub>

NMR (C<sub>6</sub>D<sub>6</sub>) δ ppm: <sup>1</sup>H, 1.32 [v. br., 1.1.1.1 q, 3H, <sup>1</sup>J<sub>BH</sub> = 75Hz, BH<sub>3</sub>(mesityl)], 2.37 (s, 3H, 4-Me), 2.73 (s, 6H, 2,6-Me), 7.09 [s, 2H, C<sub>6</sub>H<sub>2</sub>(CH<sub>3</sub>)<sub>3</sub>], <sup>11</sup>B{<sup>1</sup>H}, –32.9 (s); <sup>11</sup>B, –32.9 (q, <sup>1</sup>J<sub>BH</sub> = 76.2).

**Selected data for Li[BH<sub>3</sub>(naphthyl)]•(THF)<sub>x</sub>(Et<sub>2</sub>O)<sub>y</sub>**

NMR  $\delta$  ppm: <sup>1</sup>H (CD<sub>3</sub>CN), 1.44 [1:1:1:1 q, <sup>1</sup>J<sub>BH</sub> = 79.4 Hz, BH<sub>3</sub>(naphthyl)], 7.17 [dd, <sup>3</sup>J<sub>HH</sub> = 8.3 Hz, <sup>3</sup>J<sub>HH</sub> = 6.8 Hz, 1H, naphthyl], 7.29 [two overlapping m, 2H, naphthyl], 7.39 [br d, <sup>3</sup>J<sub>HH</sub> = 8.1 Hz, 1H, naphthyl], 7.49 [br m, 1H, naphthyl], 7.65 [m, 1H, naphthyl], 8.50 [unresolved dd, 1H, naphthyl-CH(8)]. <sup>13</sup>C{<sup>1</sup>H}(CD<sub>3</sub>CN), 123.1, 123.6, 124.6, 126.4, 128.4, 131.8, 133.3, 134.1, 140.1, carbon *ipso* to boron not observed. <sup>11</sup>B{<sup>1</sup>H} (CD<sub>2</sub>Cl<sub>2</sub>), -28.0 (s); <sup>11</sup>B (CD<sub>2</sub>Cl<sub>2</sub>), -28.0 (q, <sup>1</sup>J<sub>BH</sub> = 79 Hz).

**Full <sup>13</sup>C{<sup>1</sup>H} NMR assignments****Synthesis of Li<sup>Mes</sup>Bai]**

NMR (CD<sub>3</sub>CN)  $\delta$  ppm: <sup>13</sup>C{<sup>1</sup>H}, 20.9 [C<sub>6</sub>H<sub>2</sub>(CH<sub>3</sub>)<sub>3</sub>-CH<sub>3</sub>(4)], 22.8 [C<sub>6</sub>H<sub>2</sub>(CH<sub>3</sub>)<sub>3</sub>-CH<sub>3</sub>(2,6)], 99.7 [aza-CH(3)], 114.6 [aza-CH(5)], 123.9 [aza-C(7a)], 129.3 [aza-CH(4)], 129.9 [C<sub>6</sub>H<sub>2</sub>(CH<sub>3</sub>)<sub>3</sub>-CH(3,5)], 134.6 [aza-CH(2)], 134.9 [C<sub>6</sub>H<sub>2</sub>(CH<sub>3</sub>)<sub>3</sub>-C(2,6)], 141.8 [aza-CH(6)], 143.2 [C<sub>6</sub>H<sub>2</sub>(CH<sub>3</sub>)<sub>3</sub>-C(4)], 151.9 [aza-C(3a)], the carbon *ipso* to boron was not observed.

**Synthesis of Li<sup>Naphth</sup>Bai]**

NMR (CD<sub>3</sub>CN)  $\delta$  ppm: <sup>13</sup>C{<sup>1</sup>H}, 99.9 [aza-CH(3)], 114.8 [aza-CH(5)], 123.8 [aza-C(3a)], 124.9 [nap-CH(6)], 125.3 [nap-CH(7)], 126.3 [nap-CH(3)], 127.0 [br., nap-CH(4)], 129.2 [nap-CH(5)], 129.3 [aza-CH(4)], 129.5 (B-<sup>Naphth</sup>C<sub>ispo</sub>), 130.0 [nap-CH(8)], 131.2 [br., nap-CH(2)], 134.1 [br., aza-CH(2)], 134.8 [nap-C(8a)], 138.5 [nap-C(4a)], 142.1 [aza-CH(6)], 152.4 [aza-C(7a)].

**Rh(COD)(<sup>Mes</sup>Bai) (4)**

NMR (C<sub>7</sub>D<sub>8</sub>)  $\delta$  ppm: <sup>13</sup>C{<sup>1</sup>H}, 21.1 [C<sub>6</sub>H<sub>2</sub>(CH<sub>3</sub>)<sub>3</sub>-CH<sub>3</sub>(4)], 24.7 [C<sub>6</sub>H<sub>2</sub>(CH<sub>3</sub>)<sub>3</sub>-CH<sub>3</sub>(2,6)], 31.5 (COD), 75.7 (br., COD), 101.2 [aza-CH(3)], 114.1 [d, <sup>3</sup>J<sub>RhC</sub> = 1.1 Hz, aza-CH(5)], 124.6 [aza-C(7a)], 128.5 [aza-CH(4)], 130.1 [aza-CH(2)], 133.6 [aza-CH(6)], 134.4 [C<sub>6</sub>H<sub>2</sub>(CH<sub>3</sub>)<sub>3</sub>-C(2,6)], 142.5 [C<sub>6</sub>H<sub>2</sub>(CH<sub>3</sub>)<sub>3</sub>-C(4)], 143.3 [C<sub>6</sub>H<sub>2</sub>(CH<sub>3</sub>)<sub>3</sub>-CH(3,5)], 151.9 [aza-C(3a)], carbon *ipso* to boron not observed.

**Rh(COD)(<sup>Naphth</sup>Bai) (5)**

NMR (CD<sub>2</sub>Cl<sub>2</sub>)  $\delta$  ppm: <sup>13</sup>C{<sup>1</sup>H}, 31.7 (COD), 77.1 (br., COD), 101.2 [aza-CH(3)], 115.0 [aza-CH(5)], 124.5 [aza-CH(7a)], 124.7 [nap-CH(6)], 125.1 [nap-CH(3)], 125.8 [nap-CH(7)], 127.2 [nap-CH(4)], 129.1 [two overlapping peaks, aza-CH(4) and nap-CH(5)], 129.5 [nap-CH(8)], 131.9 [nap-CH(2)], 133.5 [aza-CH(2)], 134.8 and 138.0 [nap-C(4a) and -C(8a)], 144.3 [aza-CH(6)], 144.7 [br., tentitively assigned as carbon *ipso* to boron], 152.8 [aza-C(3a)].

**Ir(COD)(<sup>Mes</sup>Bai) (6)**

NMR (C<sub>7</sub>D<sub>8</sub>)  $\delta$  ppm: <sup>13</sup>C{<sup>1</sup>H}, 20.8 [C<sub>6</sub>H<sub>2</sub>(CH<sub>3</sub>)<sub>3</sub>-CH<sub>3</sub>(4)], 24.1 [C<sub>6</sub>H<sub>2</sub>(CH<sub>3</sub>)<sub>3</sub>-CH<sub>3</sub>(2,6)], 32.6 (COD), 57.5 (br., COD), 102.1 [aza-CH(3)], 114.3 [aza-CH(5)], 124.3 [aza-C(7a)], 128.4 [aza-CH(4), overlapping with solvent peaks observed in DEPT-135 experiment], 130.0 [aza-CH(2)], 132.2 [aza-CH(6)], 134.9 [C<sub>6</sub>H<sub>2</sub>(CH<sub>3</sub>)<sub>3</sub>-C(2,6)], 142.5 [C<sub>6</sub>H<sub>2</sub>(CH<sub>3</sub>)<sub>3</sub>-C(4)], 143.6 [C<sub>6</sub>H<sub>2</sub>(CH<sub>3</sub>)<sub>3</sub>-CH(3,5)], 153.0 [aza-C(3a)], carbon *ipso* to boron not observed; <sup>11</sup>B{<sup>1</sup>H}, -0.8 ( $\Delta\nu_{1/2}$  = 122 Hz).

**Ir(COD)(<sup>Naphth</sup>Bai) (7)**

NMR (C<sub>6</sub>D<sub>6</sub>) δ ppm: <sup>13</sup>C{<sup>1</sup>H}, 33.0 (COD), 59.0 (br., COD), 103.0 [aza-CH(3)], 115.4 [aza-CH(5)], 125.0 [aza-CH(7a)], 125.4 [nap-CH(6)], 125.6 [nap-CH(7)], 126.0 [nap-CH(3)], 128.6 [nap-CH(4)], 129.3 [aza-CH(4)], 129.6 [nap-CH(8)], 129.7 [nap-CH(5)], 132.7 [nap-CH(2)], 133.0 [aza-CH(2)], 135.4 and 138.3 [nap-C(4a) and -C(8a)], 144.2 [aza-CH(6)], 154.4 [aza-C(3a)], carbon *ipso* to boron not observed.

**Rh(NBD)(<sup>Mes</sup>Bai) (8)**

NMR (C<sub>7</sub>D<sub>8</sub>) δ ppm: <sup>13</sup>C{<sup>1</sup>H}, 21.1 [C<sub>6</sub>H<sub>2</sub>(CH<sub>3</sub>)<sub>3</sub>-CH<sub>3</sub>(4)], 24.2 [C<sub>6</sub>H<sub>2</sub>(CH<sub>3</sub>)<sub>3</sub>-CH<sub>3</sub>(2,6)], 41.6 [d, <sup>1</sup>J<sub>RhC</sub> = 10.8 Hz, NBD], 48.4 [d, <sup>2</sup>J<sub>RhC</sub> = 3.1 Hz, NBD], 58.9 [d, <sup>3</sup>J<sub>RhC</sub> = 6.9 Hz, NBD], 101.5 [aza-CH(3)], 114.0 [aza-CH(5)], 124.1 [aza-C(7a)], 128.5 [aza-CH(4) overlapping with solvent observed by DEPT-135 experiment], 130.1 [C<sub>6</sub>H<sub>2</sub>(CH<sub>3</sub>)<sub>3</sub>-CH(3,5)], 133.1 [aza-CH(2)], 134.9 [C<sub>6</sub>H<sub>2</sub>(CH<sub>3</sub>)<sub>3</sub>-C(2,6)], 143.0 [aza-CH(6)], 142.7 [C<sub>6</sub>H<sub>2</sub>(CH<sub>3</sub>)<sub>3</sub>-C(4)], 152.1 [aza-C(3a)], carbon *ipso* to boron not observed.

**Rh(NBD)(<sup>Naphth</sup>Bai) (9)**

NMR (CD<sub>2</sub>Cl<sub>2</sub>) δ ppm: <sup>13</sup>C{<sup>1</sup>H}, 43.1 [d, <sup>1</sup>J<sub>RhC</sub> = 10.1 Hz, NBD], 48.8 [d, <sup>2</sup>J<sub>RhC</sub> = 2.7 Hz, NBD], 59.5 [d, <sup>3</sup>J<sub>RhC</sub> = 6.2 Hz, NBD], 101.5 [aza-CH(3)], 114.9 [aza-CH(5)], 124.1 [aza-C(7a)], 125.0 [nap-CH(7)], 125.2 [nap-CH(6)], 125.8 [nap-CH(3)], 127.7 [nap-CH(4)], 128.9 [nap-CH(8)], 129.1 [aza-CH(4)], 129.2 [nap-CH(5)], 132.0 [nap-CH(2)], 133.0 [aza-CH(2)], 134.8 [nap-C(4a)], 137.8 [naphthyl-C(8a)], 142.6 [tentitively assigned as carbon *ipso* to boron], 142.8 [aza-CH(6)], 152.9 [aza-C(3a)].
